# Supplementary material for: Electroencephalography and Functional Magnetic Resonance Imaging-Guided Simultaneous Transcranial Direct Current Stimulation and Repetitive Transcranial Magnetic Stimulation in a Patient With Minimally Conscious State
Source: PubMed Central journal article supplement (PMC6685103; doi:10.3389/fnins.2019.00746), 2019-07-31
Supplement: Data_Sheet_1.pdf [file Data_Sheet_1.pdf]

*Supplementary Material*

| Con | Sti     |          | Sham    |          |
|-----|---------|----------|---------|----------|
|     | MCS_pre | MCS_post | MCS_pre | MCS_post |
| 5   | 3       | 2        | 3       | 3        |
| 5   | 3       | 2        | 3       | 3        |
| 5   | 3       | 3        | 3       | 3        |
| 5   | 3       | 3        | 3       | 3        |
| 5   | 3       | 3        | 3       | 3        |
| 5   | 3       | 3        | 3       | 3        |
| 5   | 3       | 3        | 3       | 3        |
| 5   | 3       | 3        | 3       | 3        |
| 5   | 3       | 3        | 3       | 3        |
| 5   | 5       | 3        | 3       | 3        |
| 5   | 5       | 3        | 3       | 3        |
| 5   | 5       | 3        | 3       | 3        |
| 5   | 5       | 5        | 3       | 3        |
| 5   | 5       | 5        | 3       | 3        |
|     | 5       | 5        | 3       |          |
|     | 5       | 5        | 3       |          |
|     | 5       | 5        | 3       |          |
|     | 5       | 5        | 3       |          |
|     | 5       | 5        | 3       |          |
|     | 5       | 5        | 3       |          |
|     | 5       | 5        | 3       |          |
|     | 5       | 5        | 3       |          |
|     | 5       | 5        | 5       |          |
|     | 5       |          | 5       |          |
|     | 5       |          | 5       |          |
|     |         |          | 5       |          |
|     |         |          | 5       |          |
|     |         |          | 5       |          |
|     |         |          | 5       |          |
|     |         |          | 5       |          |
|     |         |          | 5       |          |
|     |         |          | 5       |          |
|     |         |          | 5       |          |
|     |         |          | 5       |          |
|     |         |          | 5       |          |

**Supplementary Table 1.** MVAR model order of the patients and healthy controls. The numbers of segments in the different groups differ. The orders are not consistent across patients and healthy controls.

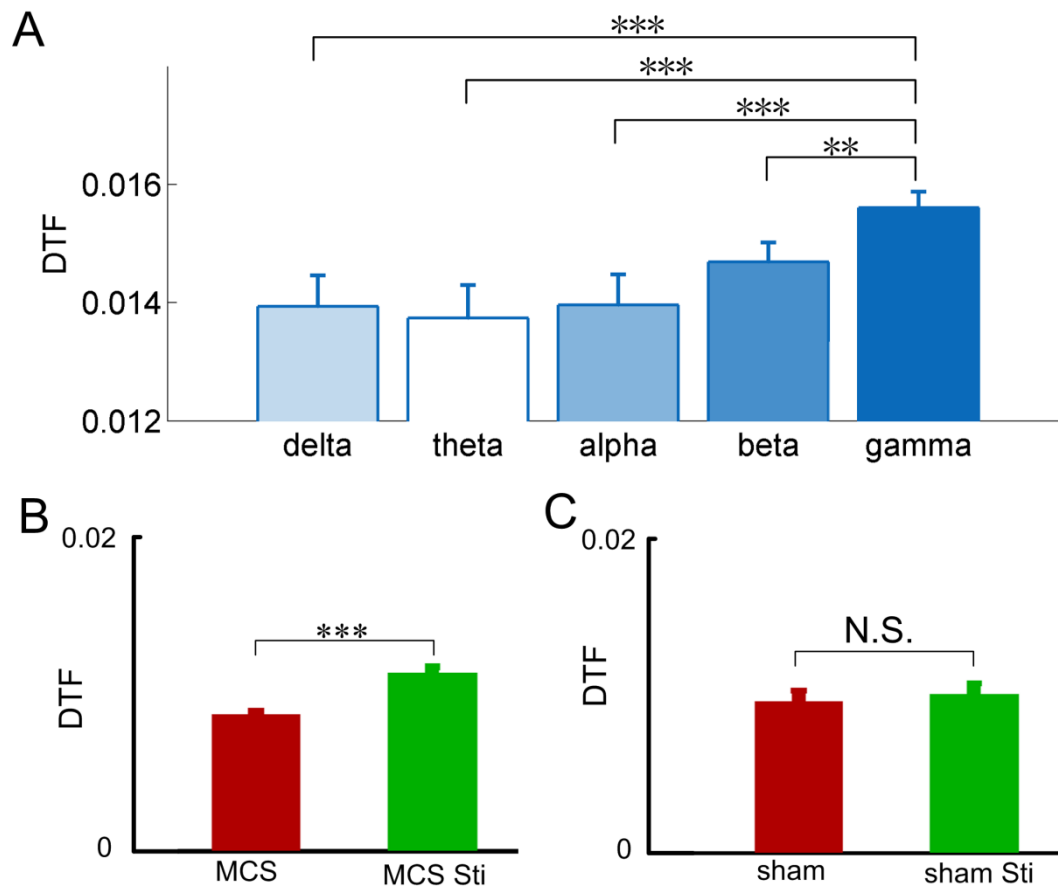

**Supplementary Figure 1.** Statistical comparison of the DTF values across different frequency ranges, pre- and post-stimulation. (A) Gamma range DTF shows a significant difference (ANOVA,  $F = 14.254$ ,  $p < 0.001$ ; *post hoc*,  $**p < 0.01$ ,  $***p < 0.001$ ). Data in the figure are expressed as the mean  $\pm$  SEM. (B) The DTF values in gamma shows the significant statistical difference between pre- and post-stimulation in MCS ( $***p < 0.001$ ). (C) The DTF values in gamma do not show difference between pre- and post-treatment in patient 2 ( $p > 0.05$ ). DTF, directional transfer function; MCS, minimally conscious state; MCS Sti, minimally conscious state after treatment; N.S., not significant; Pt 2, patient 2; Pt 2 post, patient 2 after treatment.
